# Supplementary material
Source: publisher site journal article supplement (https://www.dovepress.com/article/324968)
Supplement: Supplementary file 1 [file get_supplementary_file.php]

## Suppl. Figure 1

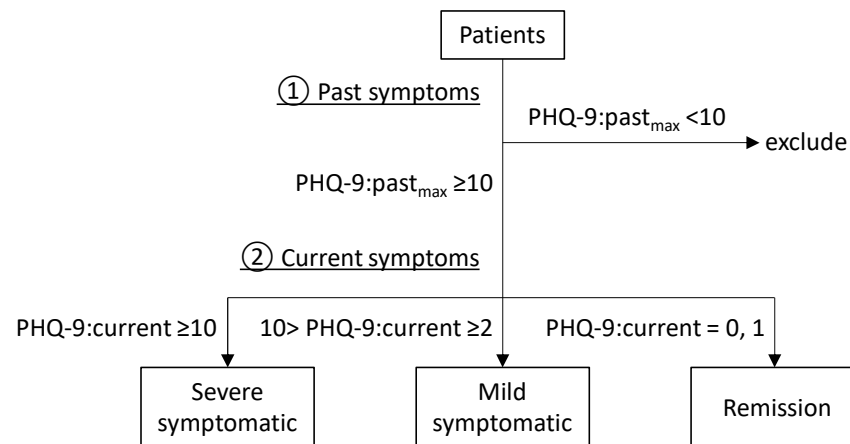

**Supplemental Figure 1** Inclusion and classification of patients into three disorder stages based on past and current PHQ-9 scores.

Patients who reported that they had experienced a severe symptom of depression, as defined by a Japanese Patient Health Questionnaire (PHQ)-9 score of  $\geq 10$  were included in the study. The three disorder stages were as follows: remission (1 or 0); mild symptomatic (2 to 9); and severe symptomatic (10 or higher).

Abbreviation: PHQ-9, Patient Health Questionnaire-9.
