# Supplementary material
Source: publisher site journal article supplement (https://www.dovepress.com/article/324968)
Supplement: Supplementary file 2 [file get_supplementary_file.php]

## Suppl. Figure 2

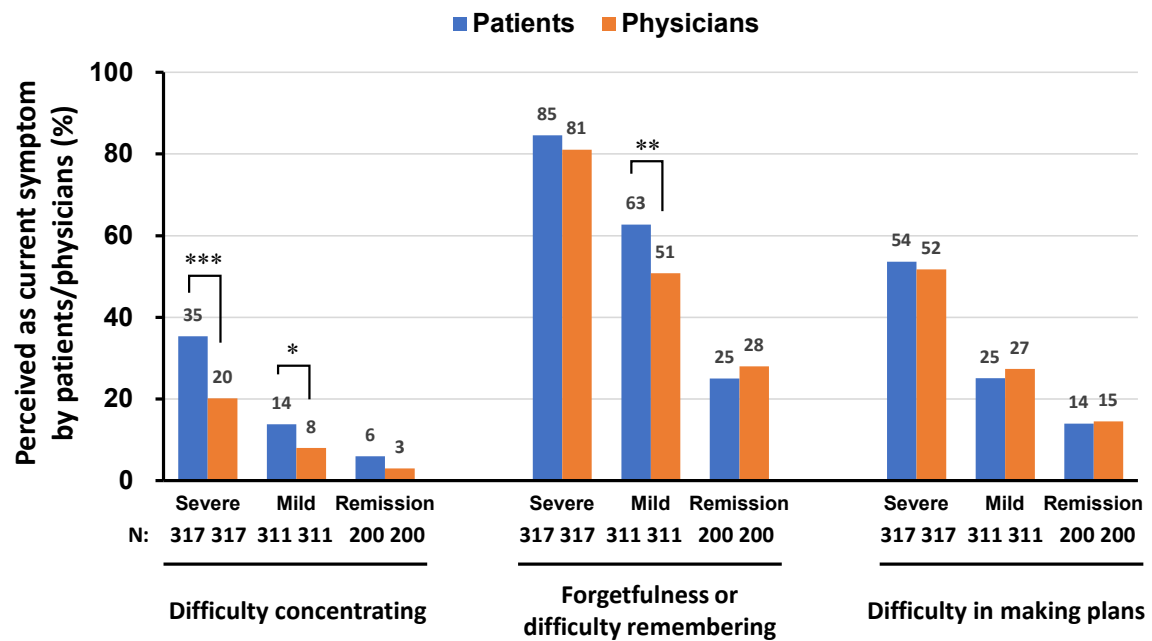

**Supplemental Figure 2** Perceptions of current cognitive symptoms at each disorder stage between patients and physicians.

\* $p < 0.05$ , \*\* $p < 0.01$ , \*\*\* $p < 0.001$ .

Abbreviation: N, number.
