# Supplementary material
Source: publisher site journal article supplement (https://www.dovepress.com/article/324968)
Supplement: Supplementary file 3 [file get_supplementary_file.php]

### Suppl. Figure 3

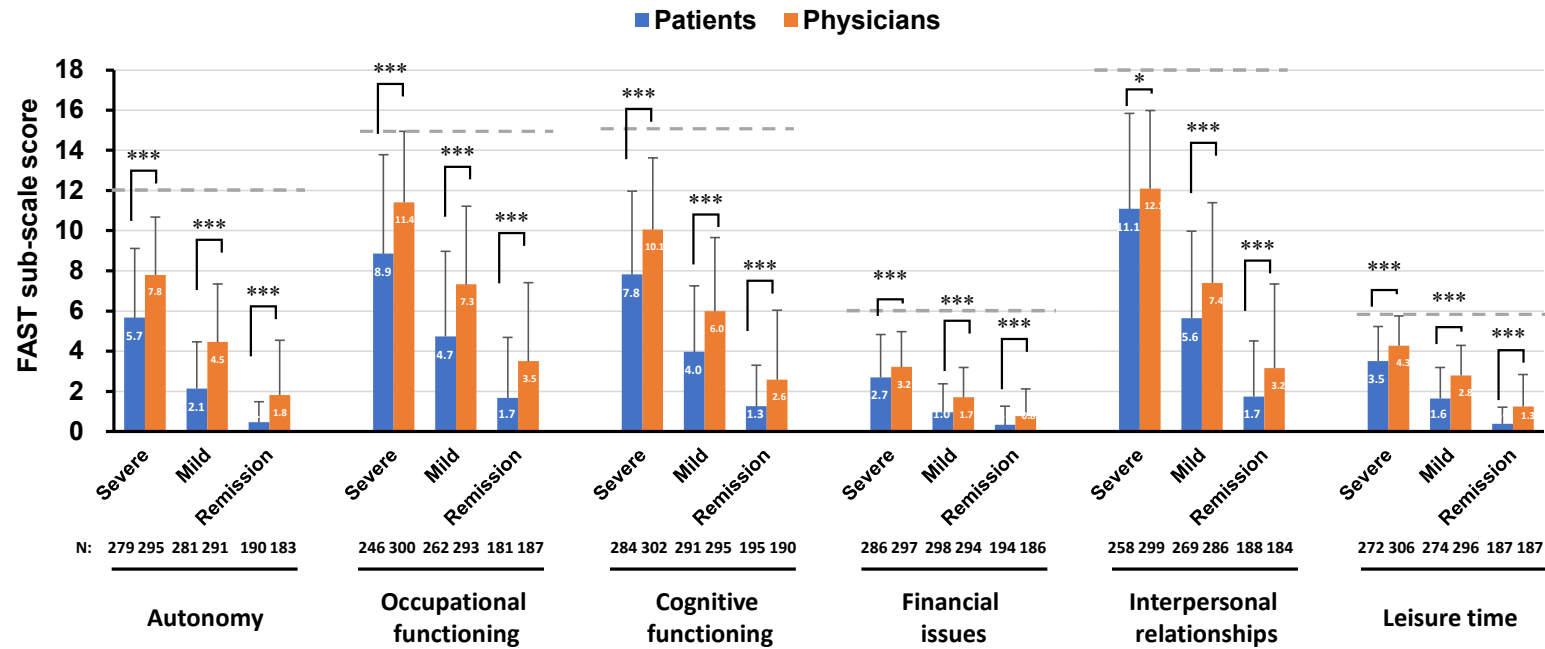

**Supplemental Figure 3** Patients and physicians; assessment of social functioning by FAST (subdomain detailed data). Answers including “don’t know” for 20% or more items within each of the respective domains were removed from the analysis of the subdomain FAST scores. Ceiling values for the respective subdomains are shown in grey dotted lines.  
 \* $p < 0.05$ , \*\*\* $p < 0.001$ .  
 Abbreviations: FAST, Functioning Assessment Short Test; N, number.
